# Supplementary material for: Real-time Genomic Characterization of Advanced Pancreatic Cancer to Enable Precision Medicine
Source: Oxford University Press journal article supplement (doi:10.1158/2159-8290.cd-18-0275), 2018-06-14
Supplement: 21598290cd180275-sup-198479_2_supp_4797197_p9vtp1.xlsx [file 21598290cd180275-sup-198479_2_supp_4797197_p9vtp1.xlsx]

## Sheet: Table S4 Tx History
Supplementary Table S4: Treatment history for patients enrolled on the PancSeq protocol. Clinical follow-up shown through September 1, 2017.
Identifier 1	Identifier 2	Gender	Race	Age at Diagnosis	Clinical vs. Research Biopsy	Days Since Diagnosis			Stage at Presentation	Treatment Status at Biopsy	Treatment Pre-biopsy for Advanced Disease	Prior Pancreatectomy	Treatment Post-biopsy
						Procedure	Death	Last Follow date
0400006_T1	PANFR0030	F	Asian	77.5644	Clinical	0	250		Metastatic	Presented with panc mass and liver met, no tissue dx	No prior chemotherapy	No	Gemcitabine/nab-paclitaxel
0400007_T1	PANFR0031	M	White	61.7753	Clinical	0	515		Locally Advanced	Presented with borderline resectable pancreas cancer, no tissue dx	No prior chemotherapy	No	FOLFIRINOX -- > Gemcitabine/nab-paclitaxel
0400008_T1	PANFR0033	M	White	84.5781	Clinical	0	92		Metastatic	Presented with panc mass and liver/lung met, no tissue dx	No prior chemotherapy	No	Gemcitabine/nab-paclitaxel
0400009_T1	PANFR0038	M	White	72.6	Clinical	0	200		Metastatic	Presented with panc mass and liver met, no tissue dx	No prior chemotherapy	No	Gemcitabine/nab-paclitaxel
0400010_T1	PANFR0045	F	White	61.9233	Clinical	598	Alive	1403	Metastatic	Presented s/p Whipple and adjuvant Gemcitabine/Chemoradiation (w/ 5FU) with new liver lesions suspicious for recurrence	No prior chemotherapy	Yes	FOLFIRINOX --> lost to f/u
0400027_T1	PANFR0027	M	White	64.2411	Clinical	10	Alive	896	Metastatic	Presented with panc mass and liver met, no tissue dx	No prior chemotherapy	No	FOLFOX --> Whipple (11/23/15) --> surveillance (NED)
0400046_T1	PANFR0046	M	Black or African American	81.2247	Clinical	574	705		Metastatic	Presented after progression on FOLFIRINOX for borderline resectable disease, new liver met, prior tissue dx	FOLFIRINOX, Chemoradiation (w/ 5FU)	No	Gemcitabine/nab-paclitaxel
0400047_T1	PANFR0047	M	White	65.1918	Clinical	417	691		Metastatic	Presented s/p neoadjuvant FOLFIRINOX, FOLFIRI, SBRT and whipple, new peritoneal met, no prior tissue dx	No prior chemotherapy	Yes	Gemcitabine/nab-paclitaxel
0400055_T1	PANFR0055	M	White	67.5041	Clinical	0	147		Metastatic	Presented with panc mass and liver met, no tissue dx	No prior chemotherapy	No	FOLFIRINOX --> Gemcitabine/nab-paclitaxel
0400062_T1	PANFR0062	F	White	73.4521	Clinical	0	635		Metastatic	Presented with panc mass and liver met, no tissue dx	No prior chemotherapy	No	FOLFIRINOX --> Gemcitabine/nab-paclitaxel
0400067_T1	PANFR0067	M	White	58.7671	Clinical	0	263		Metastatic	Presented with panc mass and liver met, no tissue dx	No prior chemotherapy	No	FOLFIRINOX --> Gemcitabine/nab-paclitaxel
0400068_T1	PANFR0068	M	White	44.3589	Clinical	14	Alive	693	Metastatic	Presented with panc mass and liver met, no tissue dx	No prior chemotherapy	No	FOLFIRINOX --> PARP inhibitor off label
0400069_T1	PANFR0069	F	White	66.6055	Research	329	625		Metastatic	Presented with s/p neoadjuvant FOLFIRINOX and whipple, recurrence in liver, prior tissue dx	No prior chemotherapy	Yes	Gemcitabine/nab-paclitaxel --> FOLFIRI --> FOLFOX
0400075_T1	PANFR0075	F	White	58.3041	Clinical	0	Alive	625	Metastatic	Presented with panc mass and liver met, no tissue dx	No prior chemotherapy	No	FOLFIRINOX --> PARP inhibitor clinical trial
0400078_T1	PANFR0078	F	White	38.6849	Research	498	594		Metastatic	Presented after progression on Gemcitabine/nab-paclitaxel/JAK inhibitor and FOLFIRINOX, prior tissue dx	Gemcitabine/nab-paclitaxel/JAK inhibitor, FOLFIRINOX	No	UBA1 inhibitor clinical trial --> PARP inhibitor off label
0400083_T1	PANFR0083	M	White	76.5616	Clinical	380	438		Metastatic	Presented s/p Whipple and adjuvant Gemcitabine, new liver lesions suspicious for recurrence, no tissue dx	No prior chemotherapy	Yes	FOLFOX
0400087_T1	PANFR0087	M	White	67.5479	Clinical	0	Alive	550	Metastatic	Presented with multiple liver lesions and extensive omental disease, no tissue dx	No prior chemotherapy	No	FOLFIRINOX --> FOLFIRI -- > Gemcitabine/nab-paclitaxel
0400089_T1	PANFR0089	F	White	63.0932	Research	595	666		Metastatic	Presented after progression on FOLFIRINOX and Gemcitabine/nab-paclitaxel	FOLFIRINOX, Gemcitabine/nab-paclitaxel	No	None
0400091_T1	PANFR0091	M	White	56.074	Clinical	0	25		Metastatic	Presented with panc mass and liver met, no tissue dx	No prior chemotherapy	No	FOLFOX
0400094_T1	PANFR0094	F	White	50.7205	Clinical	366	Alive	892	Metastatic	Presented with new liver lesions after FOLFIRINOX and Chemoradiation (w/ Capecitabine) for locally advanced disease, no tissue dx	No prior chemotherapy	No	Gemcitabine/nab-paclitaxel --> 5FU/nanoliposomal irinotecan
0400096_T1	PANFR0096	M	White	57.0027	Clinical	18	211		Metastatic	Presented with panc mass and liver met, prior panc tissue dx	No prior chemotherapy	No	FOLFIRINOX --> Gemcitabine/nab-paclitaxel/Anti-MUC5AC mAb clinical trial
0400097_T1	PANFR0097	M	White	48.1397	Clinical	0	243		Metastatic	Presented with panc mass and liver met, no tissue dx	No prior chemotherapy	No	FOLFIRINOX --> Gemcitabine/nab-paclitaxel --> CHK1/2 inhibitor clinical trial
0400098_T1	PANFR0098	M	White	57.9068	Clinical	14	377		Metastatic	Presented with panc mass and liver met, prior liver tissue dx	No prior chemotherapy	No	FOLFIRINOX --> Gemcitabine/nab-paclitaxel
0400100_T1	PANFR0100	M	White	65.9726	Clinical	1295	1686		Metastatic	Presented s/p Whipple and adjuvant chemoradiation (w/5FU), LN recurrence with SBRT, recurrence in liver	No prior chemotherapy	Yes	Gemcitabine/nab-paclitaxel -- > nanoliposomal irinotecan
0400116_T1	PANFR0116	M	Black or African American	49.6548	Clinical	-7	21		Metastatic	Presented with panc mass and liver/lung/bone met, no tissue dx	No prior chemotherapy	No	None
0400117_T2	PANFR0117_T2	F	White	64.7534	Research	397	Alive	484	Metastatic	Presented s/p Whipple and adjuvant Gemcitabine, Liver recurrence and s/p FOLFIRINOX and Gemcitabine/nab-paclitaxel, Clinical trial enrollment	FOLFIRINOX --> Gemcitabine/nab-paclitaxel	Yes	PI3K/mTOR inhibitor/CDK4/6 inhibitor
0400123_T1	PANFR0123	F	White	69.2877	Clinical	164	Alive	620	Metastatic	Presented with met pancreas cancer, breast cancer and lymphoma, progression on FOLFIRINOX	FOLFIRINOX	No	Gemcitabine/nab-paclitaxel --> 5FU/LV/liposomal irinotecan
0400124_T1	PANFR0124	M	White	72.537	Clinical	164	225		Metastatic	Presented after progression on FOLFIRINOX	FOLFIRINOX	No	Lost to F/U
0400127_T1	PANFR0127	F	White	59.8959	Clinical	73	368		Metastatic	Presented s/p Whipple, no tissue dx	No prior chemotherapy	Yes	FOLFIRINOX --> Gemcitabine/nab-paclitaxel --> CDK4/6 inhibitor/MEK1/2 inhibitor clinical trial
0400128_T1	PANFR0128	M	White	70.189	Research	306	331		Metastatic	Presented after progression on FOLFIRINOX. Currently on Gemcitabine/nab-paclitaxel	FOLFIRINOX, Gemcitabine/nab-paclitaxel	No	Lost to F/U
0400129_T1	PANFR0129	M	White	68.9041	Research	12	Alive	450	Metastatic	Presented with panc mass and met disease at umbilical nodule, prior umbilical nodule tissue dx	No prior chemotherapy	No	FOLFIRINOX --> 5FU/liposomal irinotecan
0400136_T1	PANFR0136	F	White	63.6329	Research	215	232		Metastatic	Presented after progression on FOLFIRINOX and Gemcitabine/nab-paclitaxel, prior tissue dx	FOLFIRINOX, Gemcitabine/nab-paclitaxel	No	Lost to F/U
0400137_T1	PANFR0137	F	White	56.2082	Clinical	405	511		Metastatic	Presented s/p neoadjuvant Gemcitabine/nab-paclitaxel, Whipple and adjuvant Gem, Liver recurrence. Currently on FOLFOX	FOLFOX	Yes	Capecitabine --> lost to f/u
0400142_T1	PANFR0142	F	White	64.6685	Clinical	30	64		Metastatic	Presented after progression on FOLFIRINOX, Chemoradiation (w/ capecitabine) and Gemcitabine/nab-paclitaxel, no prior tissue dx	FOLFIRINOX, Chemoradiation (w/ Capecitabine), Gemcitabine/nab-paclitaxel	No	None
0400148_T1	PANFR0148	M	White	65.7808	Clinical	19	243		Metastatic	Presented with panc mass and liver met, prior panc tissue dx	No prior chemotherapy	No	FOLFIRINOX --> lost to f/u
0400151_T2	PANFR0151_T2	F	White	60.5945	Research	170	292		Metastatic	Presented after progression on FOLFIRINOX. Currently on Gemcitabine/nab-paclitaxel	FOLFIRINOX, Gemcitabine/nab-paclitaxel	No	CDK2/5/9 inhibitor clinical trial
0400155_T1	PANFR0155	M	White	62.8603	Clinical	0	215		Metastatic	Presented with panc mass and extensive retroperitoneal adenopathy, no tissue dx	No prior chemotherapy	No	FOLFIRINOX
0400164_T1	PANFR0164	F	White	69.9534	Clinical	0	294		Metastatic	Presented with panc mass and liver met, no tissue dx	No prior chemotherapy	No	FOLFIRINOX --> Gemcitabine/nab-paclitaxel --> 5FU/LV/liposomal irinotecan
0400165_T1	PANFR0165	F	White	73.1452	Research	207	425	435	Metastatic	Presented after progression on FOLFIRINOX	FOLFIRINOX	No	Gemcitabine/nab-paclitaxel --> Prostaglandin E2 receptor EP4 antagonist clinical trial
0400166_T1	PANFR0166	M	White	36.8137	Research	124	161		Metastatic	Presented after progression on FOLFIRINOX and Gemcitabine/nab-paclitaxel/anti-MUC5AC mAb clinical trial	FOLFIRINOX, Gemcitabine/nab-paclitaxel/anti-MUC5AC mAb clinical trial	No	None
0400167_T1	PANFR0167	M	White	77.7233	Clinical	0	46		Metastatic	Presented with panc mass and liver met, no tissue dx	No prior chemotherapy	No	Gemcitabine/nab-paclitaxel
0400171_T1	PANFR0171	M	White	57.5096	Clinical	390	557		Metastatic	Presented s/p Whipple, adjuvant Gemcitabine with recurrence, no tissue dx	No prior chemotherapy	Yes	FOLFIRINOX --> Gemcitabine/nab-paclitaxel
0400172_T1	PANFR0172	M	White	57.6164	Clinical	0	322		Metastatic	Presented with panc mass and liver met, no tissue dx	No prior chemotherapy	No	FOLFIRINOX --> MEK1/2 inhibitor off label --> Gemcitabine/nab-paclitaxel--> ERK1/2 inhibitor single-patient IND
0400174_T1	PANFR0174	M	White	77.1397	Clinical	10	Alive	350	Metastatic	Presented with panc mass and liver met, no tissue dx	No prior chemotherapy	No	Gemcitabine/nab-paclitaxel --> 5FU/liposomal irinotecan --> PAPR inhibitor off label
0400177_T1	PANFR0177	F	White	63.5233	Research	498	632		Metastatic	Presented s/p neoadjuvant Gemcitabine/nab-paclitaxel, Whipple and adjuvant Gemcitabine/nab-paclitaxel, recurrence in lung, progression on FOLFOX, 5FU/LV/nanoliposomal irinotecan and Gemcitabine/nab-paclitaxel	FOLFOX, 5FU/liposomal irinotecan, Gemcitabine/nab-paclitaxel	Yes	PARP inhibitor + CDK1/2/5/9 inhibitor clinical trial
0400179_T1	PANFR0179	F	White	68.337	Clinical	0	120		Metastatic	Presented with panc mass and liver met, no tissue dx	No prior chemotherapy	No	Gemcitabine/nab-paclitaxel
0400181_T1	PANFR0181	F	White	49.474	Clinical	45	Alive	367	Metastatic	Presented s/p Whipple with liver lesions, no tissue dx	No prior chemotherapy	Yes	FOLFIRINOX --> Surveillance
0400187_T1	PANFR0187	F	White	69.1644	Clinical	83	325		Metastatic	Presented s/p Whipple with postop liver MRI showing recurrence in liver, no prior tissue dx	No prior chemotherapy	Yes	FOLFIRINOX --> Gemcitabine/nab-paclitaxel
0400192_T1	PANFR0192	M	White	66.8493	Research	51	82		Metastatic	Presented with panc mass and liver met, prior tissue dx	No prior chemotherapy	No	Gemcitabine/nab-paclitaxel
0400193_T1	PANFR0193	F	White	64.6521	Research	209	Alive	497	Metastatic	Presented after progression on Gemcitabine/nab-paclitaxel, prior tissue dx	Gemcitabine/nab-paclitaxel	No	FOLFIRI --> Oxaliplatin/Capecitabine --> lost to f/u
0400195_T1	PANFR0195	F	White	53.8986	Research	15	292		Metastatic	Presented with panc mass and liver met, prior tissue dx	No prior chemotherapy	No	FOLFIRINOX --> Gemcitabine/nab-paclitaxel
0400197_T1	PANFR0197	F	White	65.3753	Research	300	503		Metastatic	Presented after progression on FOLFIRINOX and Gemcitabine/nab-paclitaxel	FOLFIRINOX, Gemcitabine/nab-paclitaxel	No	MEK1/2 inhibitor off label --> ERK1/2 inhibitor single-patient IND
0400198_T1	PANFR0198	M	White	61.8466	Clinical	0	Alive	273	Metastatic	Presented with panc mass and liver met, no tissue dx	No prior chemotherapy	No	FOLFIRINOX
0400199_T1	PANFR0199	M	White	86.3507	Clinical	-14	56		Metastatic	Presented with no clear panc mass but liver lesions, prior tissue suspicious for adenocarcinoma	No prior chemotherapy	No	Gemcitabine
0400202_T1	PANFR0202	M	White	83	Research	274	Alive	547	Metastatic	Presented after progression on first ROS1 inhibitor, pre-tx bx before second ROS1 inhibitor	ROS1 inhibitor	No	ROS1 inhibitor off-label --> ROS1 inhibtor off label
0400203_T1	PANFR0203	M	White	54.7808	Research	273	334		Metastatic	Presented after progression on FOLFIRINOX	FOLFIRINOX	No	Gemcitabine/nab-paclitaxel
0400207_T1	PANFR0207	M	White	60.6767	Clinical	393	473		Metastatic	Presented s/p neoadjuvant FOLFIRINOX and Chemoradiation (w/ Capecitabine) and Whipple. Recurrence in liver and lung	No prior chemotherapy	Yes	None
0400208_T1	PANFR0208	M	White	55.8192	Research	512	590		Metastatic	Presented after progression on FOLFIRINOX and Gemcitabine/nab-paclitaxel/anti-MUC5AC mAb clinical trial	FOLFIRINOX, Gemcitabine/nab-paclitaxel/anti-MUC5AC mAb clinical trial	No	5FU/liposomal irinotecan
0400209_T1	PANFR0209	M	White	61.3397	Clinical	0	Alive	267	Locally Advanced	Presented with borderline resectable pancreas cancer, no tissue dx	N/A	N/A	Neoadjuvant FOLFOX --> Neoadjuvant Chemoradiation (w/ Capecitabine) --> Resection
0400214_T1	PANFR0214	M	White	58.7589	Clinical	0	Alive	245	Locally Advanced	Presented with borderline resectable pancreas cancer, no tissue dx	N/A	N/A	FOLFIRINOX --> Resection
0400215_T1	PANFR0215	M	White	52.8548	Clinical	62	Alive	310	Metastatic	Presented s/p Whipple with liver lesions, no tissue dx	No prior chemotherapy	Yes	Gemcitabine/Cisplatin --> FOLFOX
0400220_T1	PANFR0220	F	White	54.5671	Research	232	308		Metastatic	Presented after progression on FOLFIRINOX and Gemcitabine/nab-paclitaxel	FOLFIRINOX, Gemcitabine/nab-paclitaxel	No	Chemoradiation (w/ 5FU)
0400222_T1	PANFR0222	F	White	38.4959	Clinical	0	115		Metastatic	Presented with panc mass and liver met, no tissue dx	No prior chemotherapy	No	FOLFIRINOX --> Gemcitabine/nab-paclitaxel
0400225_T1	PANFR0225	F	White	62.1507	Clinical	664	Alive	868	Metastatic	Presented s/p Whipple and adjuvant Gemcitabine and Chemoradiation (w/ 5FU), recurrence in liver and progression on Gemcitabine/nab-paclitaxel, 5FU/Irinotecan, anti-PD-1 mAb/PI3K Delta Inhibitor	Gemcitabine/nab-paclitaxel, 5FU/Irinotecan, anti-PD-1 mAb/PI3K Delta Inhibitor	Yes	CDK inhibitor/CDK4/6 inhibitor/MEK inhibitor --> Surveillance
0400231_T1	PANFR0231	M	White	73.8877	Clinical	0	Alive	200	Metastatic	Presented with panc mass and liver met, no tissue dx	No prior chemotherapy	No	FOLFIRINOX
0400233_T1	PANFR0233	F	Unknown or Not Reported	55.9863	Research	138	167		Metastatic	Presented after progression on FOLFIRINOX	FOLFIRINOX	No	Gemcitabine/nab-paclitaxel
0400235_T1	PANFR0235	M	White	64.6164	Research	275	345		Metastatic	Presented after progression on FOLFIRINOX, Gemcitabine/nab-paclitaxel and 5FU/nanoliposomal irinotecan	FOLFIRINOX, Gemcitabine/nab-paclitaxel, 5FU/liposomal irinotecan	No	Lost to F/U
0400237_T1	PANFR0237	F	White	61.2027	Clinical	0	131		Metastatic	Presented with panc mass and liver met, no tissue dx	No prior chemotherapy	No	FOLFIRINOX
0400242_T1	PANFR0242	F	Black or African American	62.6521	Clinical	0	Alive	171	Metastatic	Presented with panc mass and liver met, no tissue dx	No prior chemotherapy	No	FOLFIRINOX --> PARP inhibitor vs. placebo clinical trial
0400243_T1	PANFR0243	M	White	72.9041	Clinical	0	Alive	177	Metastatic	Presented with panc mass and liver met, no tissue dx	No prior chemotherapy	No	Lost to F/U
0400245_T1	PANFR0245	M	White	56.7836	Research	20	Alive	190	Metastatic	Presented with panc mass and liver met, prior tissue dx	No prior chemotherapy	No	FOLFIRINOX --> anti-PD-1 mAb/CXCR4 antagonist clinical trial --> Gemcitabine/nab-paclitaxel
0400246_T1	PANFR0246	M	White	54.3699	Clinical	0	15		Metastatic	Presented with panc mass and widespread metastatic disease, no tissue dx	No prior chemotherapy	No	None
0400251_T1	PANFR0251	M	White	66.7644	Research	23	71		Metastatic	Presented with panc mass and liver met, prior tissue dx	No prior chemotherapy	No	FOLFIRINOX
0400253_T1	PANFR0253	F	White	64.9562	Research	12	Alive	161	Metastatic	Presented with panc mass and peritoneal carcinomatosis, prior tissue dx	No prior chemotherapy	No	FOLFIRINOX --> lost to f/u
0400267_T1	PANFR0267	M	White	65.7671	Clinical	0	Alive	119	Metastatic	Presented with panc mass and liver met, no tissue dx	No prior chemotherapy	No	FOLFIRINOX
0400268_T1	PANFR0268	M	White	66.5726	Clinical	0	91		Metastatic	Presented with panc mass, liver, lung and bony lesions, no tissue dx	No prior chemotherapy	No	FOLFIRINOX
0400270_T1	PANFR0270	F	White	65.7068	Clinical	1159	Alive	1268	Metastatic	Presented s/p neoadjuvant Gemcitabine/nab-paclitaxel, Whipple, lung recurrence months later, s/p Gemcitabine/nab-paclitaxel, Capecitabine, 5FU/nanoliposomal irinotecan and FOLFOX, Clinical trial enrollment	Gemcitabine/nab-paclitaxel, Capecitabine, 5FU/liposomal irinotecan, FOLFOX	Yes	anti-PD-1 mAb/anti-GITR mAb agonist clinical trial
0400273_T1	PANFR0273	F	White	61.9808	Research	10	Alive	115	Metastatic	Presented with panc mass and liver met, prior tissue dx	No prior chemotherapy	No	Lost to F/U
0400278_T1	PANFR0278	M	White	57.3945	Clinical	0	Alive	91	Metastatic	Presented with panc mass and liver met, no tissue dx	No prior chemotherapy	No	FOLFIRINOX --> Gemcitabine/nab-paclitaxel
