# Supplementary material for: Real-time Genomic Characterization of Advanced Pancreatic Cancer to Enable Precision Medicine
Source: Oxford University Press journal article supplement (doi:10.1158/2159-8290.cd-18-0275), 2018-06-14
Supplement: 21598290cd180275-sup-198479_2_supp_4797204_p9vtpb.docx [file 21598290cd180275-sup-198479_2_supp_4797204_p9vtpb.docx]

Supplementary Table S2: Characteristics of biopsies obtained on PancSeq protocol. *Cellularity from FFPE core biopsy specimens. Cellularity data not available from patients who underwent fine needle aspirates (N=3).

| Characteristic | Pilot Study  (N=10) | CLIA-Certified Study  (N=69) | Full Population  (N=79) |
| --- | --- | --- | --- |
| Biopsy dates | Mar-Sept 15 | Oct 15-Jun 17 | Mar 15-Jun 17 |
| Biopsy site, N (%) |  |  |  |
| Primary pancreatic tumor | 1 (10) | 6 (9) | 7 (9) |
| Metastatic lesion |  |  |  |
| Liver | 8 (80) | 55 (80) | 63 (80) |
| Peritoneum | 1 (10) | 5 (7) | 6 (8) |
| Lymph node | 0 (0) | 2 (3) | 2 (3) |
| Ovary | 0 (0) | 1 (1) | 1 (1) |
| Biopsy approach, N (%) |  |  |  |
| Percutaneous | 10 (100) | 62 (90) | 72 (91) |
| Endoscopic | 0 (0) | 6 (9) | 6 (8) |
| Intraoperative | 0 (0) | 1 (1) | 1 (1) |
| Biopsy type, N (%) |  |  |  |
| Fine needle aspirate (25-gauge) | 1 (10) | 2 (3) | 3 (4) |
| Core needle biopsy (18 to 22-gauge) | 9 (90) | 67 (97) | 76 (96) |
| Specimens obtained per biopsy, Median (range) | 5 (3-8) | 5 (1-10) | 5 (1-10) |
| Size of lesion biopsied (cm), Median (range) | 2.0 (0.9 – 4.1) | 3.0 (0.7-7.6) | 2.9 (0.7-7.6) |
| Biopsy indication, N (%) |  |  |  |
| Clinical indication | 10 (100) | 44 (64) | 54 (68) |
| Research purposes only | 0 (0) | 25 (36) | 25 (32) |
| Whole exome sequencing, N (%) | 10 (100) | 63 (91) | 73 (92) |
| Tissue preservation of sequenced core, N (%) |  |  |  |
| Fresh frozen | 10 (100) | 58 (92) | 68 (93) |
| Formalin-fix, paraffin-embedded (FFPE) | 0 (0) | 5 (8) | 5 (7) |
| Tumor cellularity by H&E, Median (range) * | 40 (20-70) | 40 (5-80) | 40 (5-80) |
| WES data with successful mutation and copy number calls, N (%) | 8 (80) | 63 (100) | 71 (97) |
| Mean target coverage, Median (range) |  |  |  |
| Normal specimen | 117 (90-179) | 178 (139-301) | 176 (90-301) |
| Tumor specimen | 285 (157-626) | 191 (153-283) | 191 (153-626) |
| ABSOLUTE tumor cellularity, Median (range) | 0.36 (0.15-0.91) | 0.33 (0.03-0.76) | 0.33 (0.03-0.91) |
| Days from biopsy to analyzed data, Median (range) |  |  |  |
| Clinical indication | - | 39 (16-67) |  |
| Research purposes only | - | 28 (15-51) |  |
| RNAseq, N (%) | 9 (90) | 54 (78) | 63 (80) |
| Read count, Median (range) | 1.0E+08  (6.9E+07-2.2E+08) | 9.1E+07  (2.5E+04-1.7E+08) | 9.2E+07  (2.5E+04-2.2E+08) |
